# Supplementary material for: Declining Death Rates Reflect Progress against Cancer
Source: PLoS One. 2010 Mar 9;5(3):e9584. doi: 10.1371/journal.pone.0009584 (PMC2834749; doi:10.1371/journal.pone.0009584)
Supplement: Table S1 — Trends in Overall Mortality for All Cancers by Race and Sex, 1970–2006 and 1990–2006. (0.04 MB XLS) [file pone.0009584.s002.xls]

## Sheet: Race
			Trend 1			Trend 2			Trend 3			Trend 4			Trend 5
			Years	APC*		Years	APC*		Years	APC*		Years	APC*		Years	APC*
Based on 1970-2006 data
	White	Male	1970-1980	0.72	†	1980-1992	0.21	†	1992-2002	-1.41	†	2002-2006	-1.89	†
		Female	1970-1975	-0.25		1975-1991	0.56	†	1991-2001	-0.62	†	2001-2006	-1.37	†
	Black	Male	1970-1982	1.88	†	1982-1990	0.99	†	1990-1993	-0.23		1993-2000	-2.01	†	2000-2006	-2.81	†
		Female	1990-1975	0.04		1975-1991	0.99	†	1991-1999	-0.58	†	1999-2006	-1.54	†
Based on 1990-2006 data
	American Indian and Alaskan Native	Male	1990-1997	1.03		1997-2006	-2.57	†
		Female	1990-2006	-0.44	†
	Asian American and Pacific Islander	Male	1990-1993	0.78		1993-2006	-2.09	†
		Female	1990-1993	1.71		1993-2006	-1.18	†
	Hispanic	Male	1990-1998	0.26		1998-2006	-2.43	†
		Female	1990-1999	0.06		1999-2006	-1.39	†
Table S1. Trends in Overall Mortality for All Cancers by Race and Sex, 1970-2006 and 1990-2006
