# Supplementary material for: Declining Death Rates Reflect Progress against Cancer
Source: PLoS One. 2010 Mar 9;5(3):e9584. doi: 10.1371/journal.pone.0009584 (PMC2834749; doi:10.1371/journal.pone.0009584)
Supplement: Table S3 — Trends in Mortality for Common Cancers by Sex and Age, 1970–2006. (0.03 MB XLS) [file pone.0009584.s004.xls]

## Sheet: Common Cancers
		Trend 1			Trend 2			Trend 3			Trend 4			Trend 5
		Years	APC*		Years	APC*		Years	APC*		Years	APC*		Years	APC*
Lung Cancer
	Male
	All Ages	1970-1978	2.44	†	1978-1984	1.17	†	1984-1990	0.43	†	1990-1994	-1.27	†	1994-2006	-1.98	†
	20-49	1970-1976	0.15		1976-1991	-2.77	†	1991-1995	-5.47	†	1995-2004	-2.15	†	2004-2006	-5.86	†
	50-64	1970-1978	1.6	†	1978-1988	0.16		1988-1993	-2.32	†	1993-1999	-4.17	†	1999-2006	-3.06	†
	≥ 65	1970-1977	3.4	†	1977-1983	2.28	†	1983-1991	1.02	†	1991-1997	-0.8	†	1997-2006	-1.61	†
	Female
	All Ages	1970-1982	6.11	†	1982-1990	4.16	†	1990-1995	1.71	†	1995-2003	0.29	†	2003-2006	-0.93	†
	20-49	1970-1978	3.37	†	1978-1988	-0.93	†	1988-1996	-2.78	†	1996-2006	-0.03
	50-64	1970-1977	6.86	†	1977-1983	4.89	†	1983-1990	2.27	†	1990-1995	-1.07	†	1995-2006	-2.14	†
	≥ 65	1970-1983	7.46	†	1983-1990	6.16	†	1990-1995	3.54	†	1995-2002	1.29	†	2002-2006	-0.12
Colorectal Cancer
	Male
	All Ages	1970-1979	0.35	†	1979-1987	-0.56	†	1987-2002	-1.97	†	2002-2006	-4	†
	20-49	1970-1975	0.21		1975-1998	-1.48	†	1998-2001	3.17		2001-2006	-2.31	†
	50-64	1970-1986	-0.35	†	1986-2002	-1.82	†	2002-2006	-3.17	†
	≥ 65	1970-1980	0.57	†	1980-1989	-0.86	†	1989-2001	-2.12	†	2001-2006	-3.79	†
	Female
	All Ages	1970-1984	-0.93	†	1984-2001	-1.83	†	2001-2006	-3.34	†
	20-49	1970-1990	-2.55	†	1990-2006	-0.39	†
	50-64	1970-1985	-1.51	†	1985-2006	-2.35	†
	≥ 65	1970-1984	-0.62	†	1984-2001	-1.78	†	2001-2006	-3.74	†
Prostate Cancer
	Male
	All Ages	1970-1987	0.9	†	1987-1991	3.05	†	1991-1994	-0.56		1994-2006	-4.06	†
	20-49	1970-2006	-0.64	†
	50-64	1970-1987	0.31	†	1987-1990	3.83		1990-1996	-3.47	†	1996-2000	-5.82	†	2000-2006	-1.31	†
	≥ 65	1970-1987	0.95	†	1987-1991	3.12	†	1991-1994	-0.27		1994-2006	-4.11	†
Breast Cancer
	Female
	All Ages	1970-1979	-0.19		1979-1989	0.55	†	1989-1995	-1.52	†	1995-1998	-3.43	†	1998-2006	-1.88	†
	20-49	1970-1981	-1.34	†	1981-1989	0.25		1989-2006	-3.15	†
	50-64	1970-1989	-0.06		1989-2000	-2.85	†	2000-2006	-1.92	†
	≥ 65	1970-1979	0.31		1979-1991	1.15	†	1991-2006	-1.76	†
Table S3. Trends in Mortality for Common Cancers by Sex and Age, 1970-2006
