# Supplementary material for: Declining Death Rates Reflect Progress against Cancer
Source: PLoS One. 2010 Mar 9;5(3):e9584. doi: 10.1371/journal.pone.0009584 (PMC2834749; doi:10.1371/journal.pone.0009584)
Supplement: Table S5 — Trends in Mortality for Additional Cancers by Sex, 1970–2006. (0.03 MB XLS) [file pone.0009584.s006.xls]

## Sheet: Major Cancers by Site
		Trend 1			Trend 2			Trend 3			Trend 4			Trend 5
		Years	APC*		Years	APC*		Years	APC*		Years	APC*		Years	APC*
All Ages
Oral Cavity and Pharynx	Male	1970-1980	-0.81	†	1980-2006	-2.21	†
	Female	1970-1979	0.13		1979-1991	-1.16	†	1991-2006	-2.42	†
Esophagus	Male	1970-1995	0.97	†	1995-2006	0.45	†
	Female	1970-1978	1.26	†	1978-2000	0		2000-2006	-1.31	†
Stomach	Male	1970-1978	-3.25	†	1978-1993	-1.97	†	1993-2006	-3.63	†
	Female	1970-1974	-3.77	†	1974-1987	-2.81	†	1987-1990	-0.32		1990-2006	-2.69	†
Liver and Intrahepatic Bile Duct	Male	1970-1977	-1.75	†	1977-1986	1.96	†	1986-1995	3.76	†	1995-2006	1.96	†
	Female	1970-1978	-2.47	†	1978-1988	1.43	†	1988-1995	3.93	†	1995-2000	0.2		2000-2006	1.81	†
Pancreas	Male	1970-1977	-0.17		1977-1986	-0.88	†	1986-2003	-0.24	†	2003-2006	1.01
	Female	1970-1972	-1.59		1972-1984	0.78	†	1984-2006	0.1	†
Melanoma of the Skin	Male	1970-1978	3.73	†	1978-1989	2.04	†	1989-1998	0.61	†	1998-2002	-1.35		2002-2006	1.98	†
	Female	1970-1985	1.4	†	1985-2006	-0.47	†
Cervix Uteri	Female	1970-1979	-5.12	†	1979-1985	-3.04	†	1985-1994	-1.22	†	1994-2004	-3.4	†	2004-2006	0.31
Corpus and Uterus, NOS	Female	1970-1989	-1.65	†	1989-1997	-0.64	†	1997-2006	0.26
Ovary	Female	1970-1984	-0.87	†	1984-1992	0.51	†	1992-1998	-1.27	†	1998-2002	0.77		2002-2006	-1.41	†
Urinary Bladder	Male	1970-1977	0.13		1977-1987	-1.97	†	1987-2006	-0.36	†
	Female	1970-1986	-1.57	†	1986-2006	-0.44	†
Kidney and Renal Pelvis	Male	1970-1992	0.98	†	1992-2002	-0.1		2002-2006	-1.46	†
	Female	1970-1994	1.04	†	1994-2006	-0.72	†
Brain and Other Nervous System	Male	1970-1991	1	†	1991-2006	-0.9	†
	Female	1970-1992	1.03	†	1992-2006	-1.12	†
Hodgkin Lymphoma	Male	1970-1978	-7.5	†	1978-2000	-3.78	†	2000-2006	-1.22
	Female	1970-1979	-7.71	†	1979-2006	-2.91	†
Non-Hodgkin Lymphoma	Male	1970-1977	-0.03		1977-1991	2.74	†	1991-1997	1.59	†	1997-2006	-2.99	†
	Female	1970-1978	0.66	†	1978-1986	2.66	†	1986-1997	1.82	†	1997-2006	-3.53	†
Leukemia	Male	1970-1995	-0.16	†	1995-2006	-0.85	†
	Female	1970-1974	-2.38	†	1974-1980	0.61		1980-2000	-0.38	†	2000-2006	-1.64	†
Table S5. Trends in Mortality for Additional Cancers by Sex, 1970-2006
